# Supplementary material
Source: Research Square preprint supplement (doi:10.21203/rs.3.rs-9007476/v1)

Appendix 1 Score by userフォームの始まり


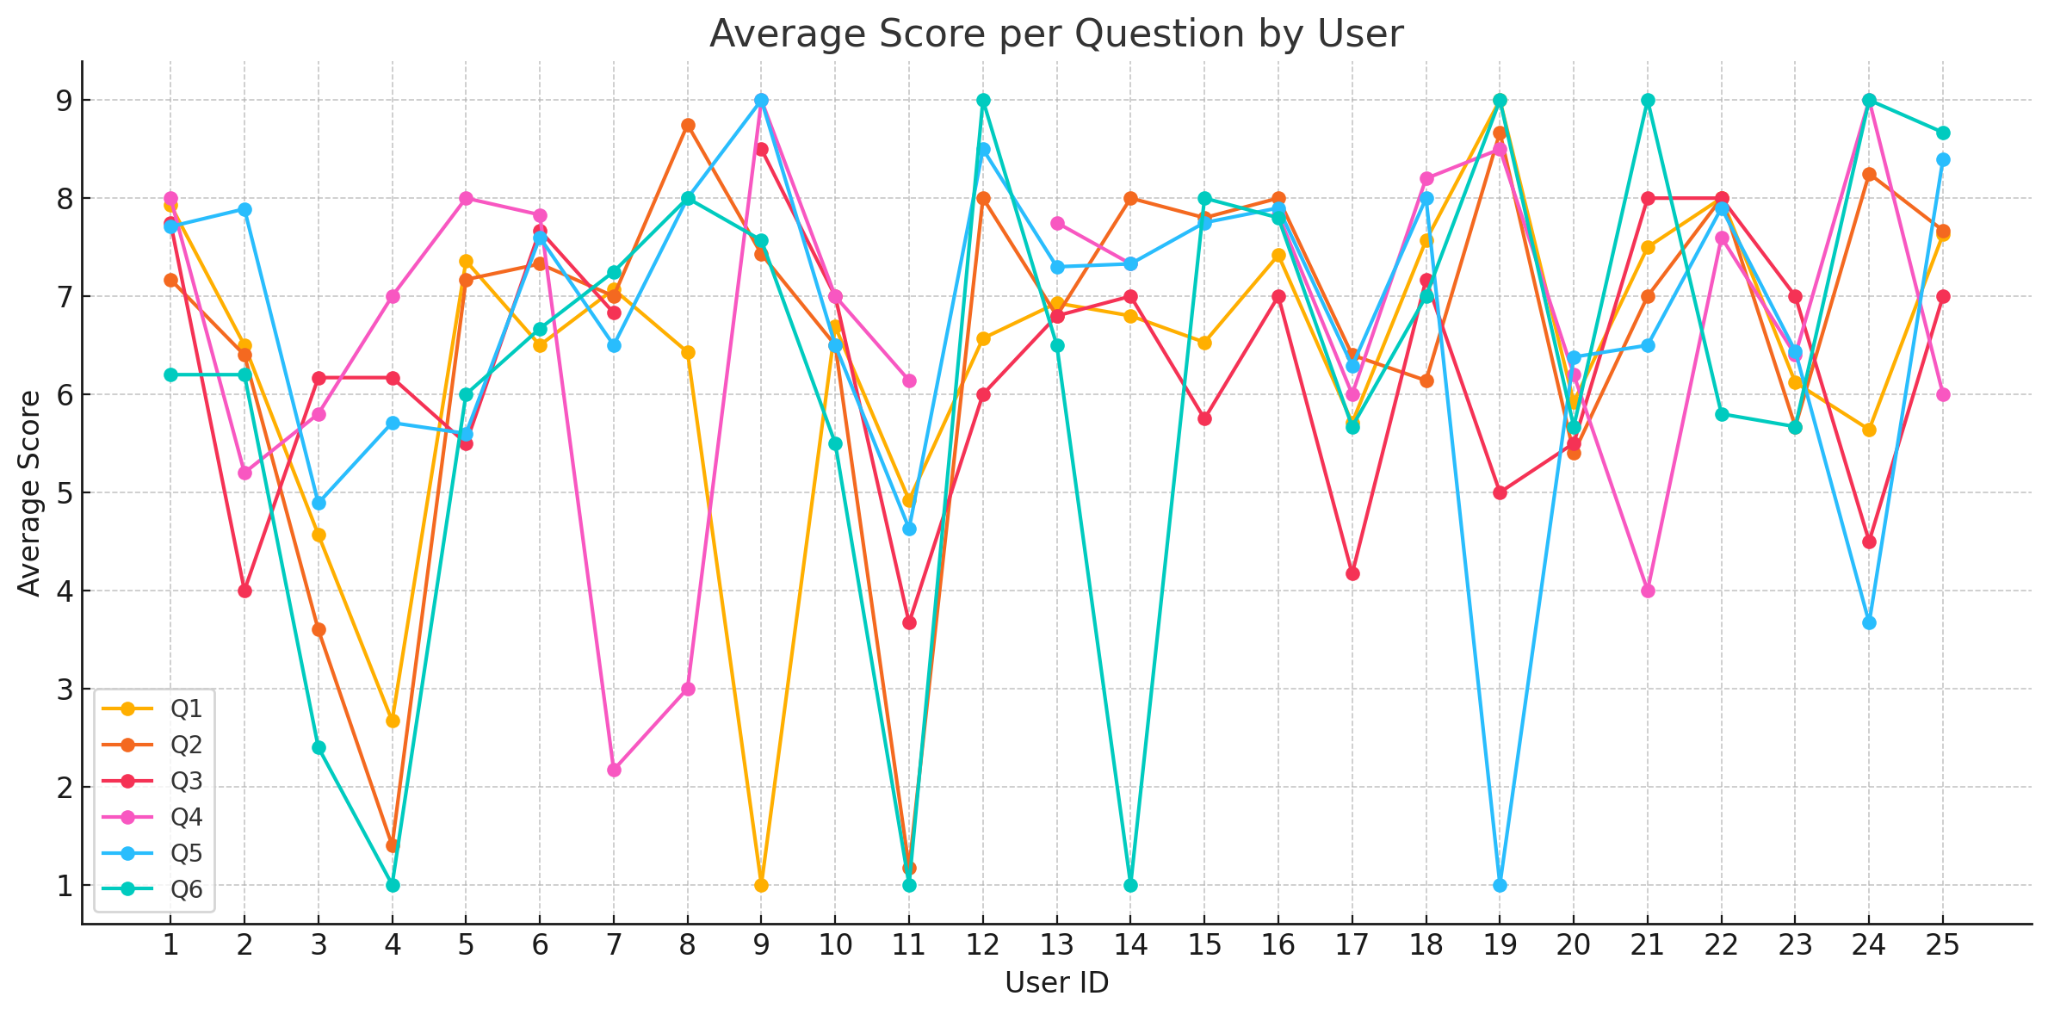

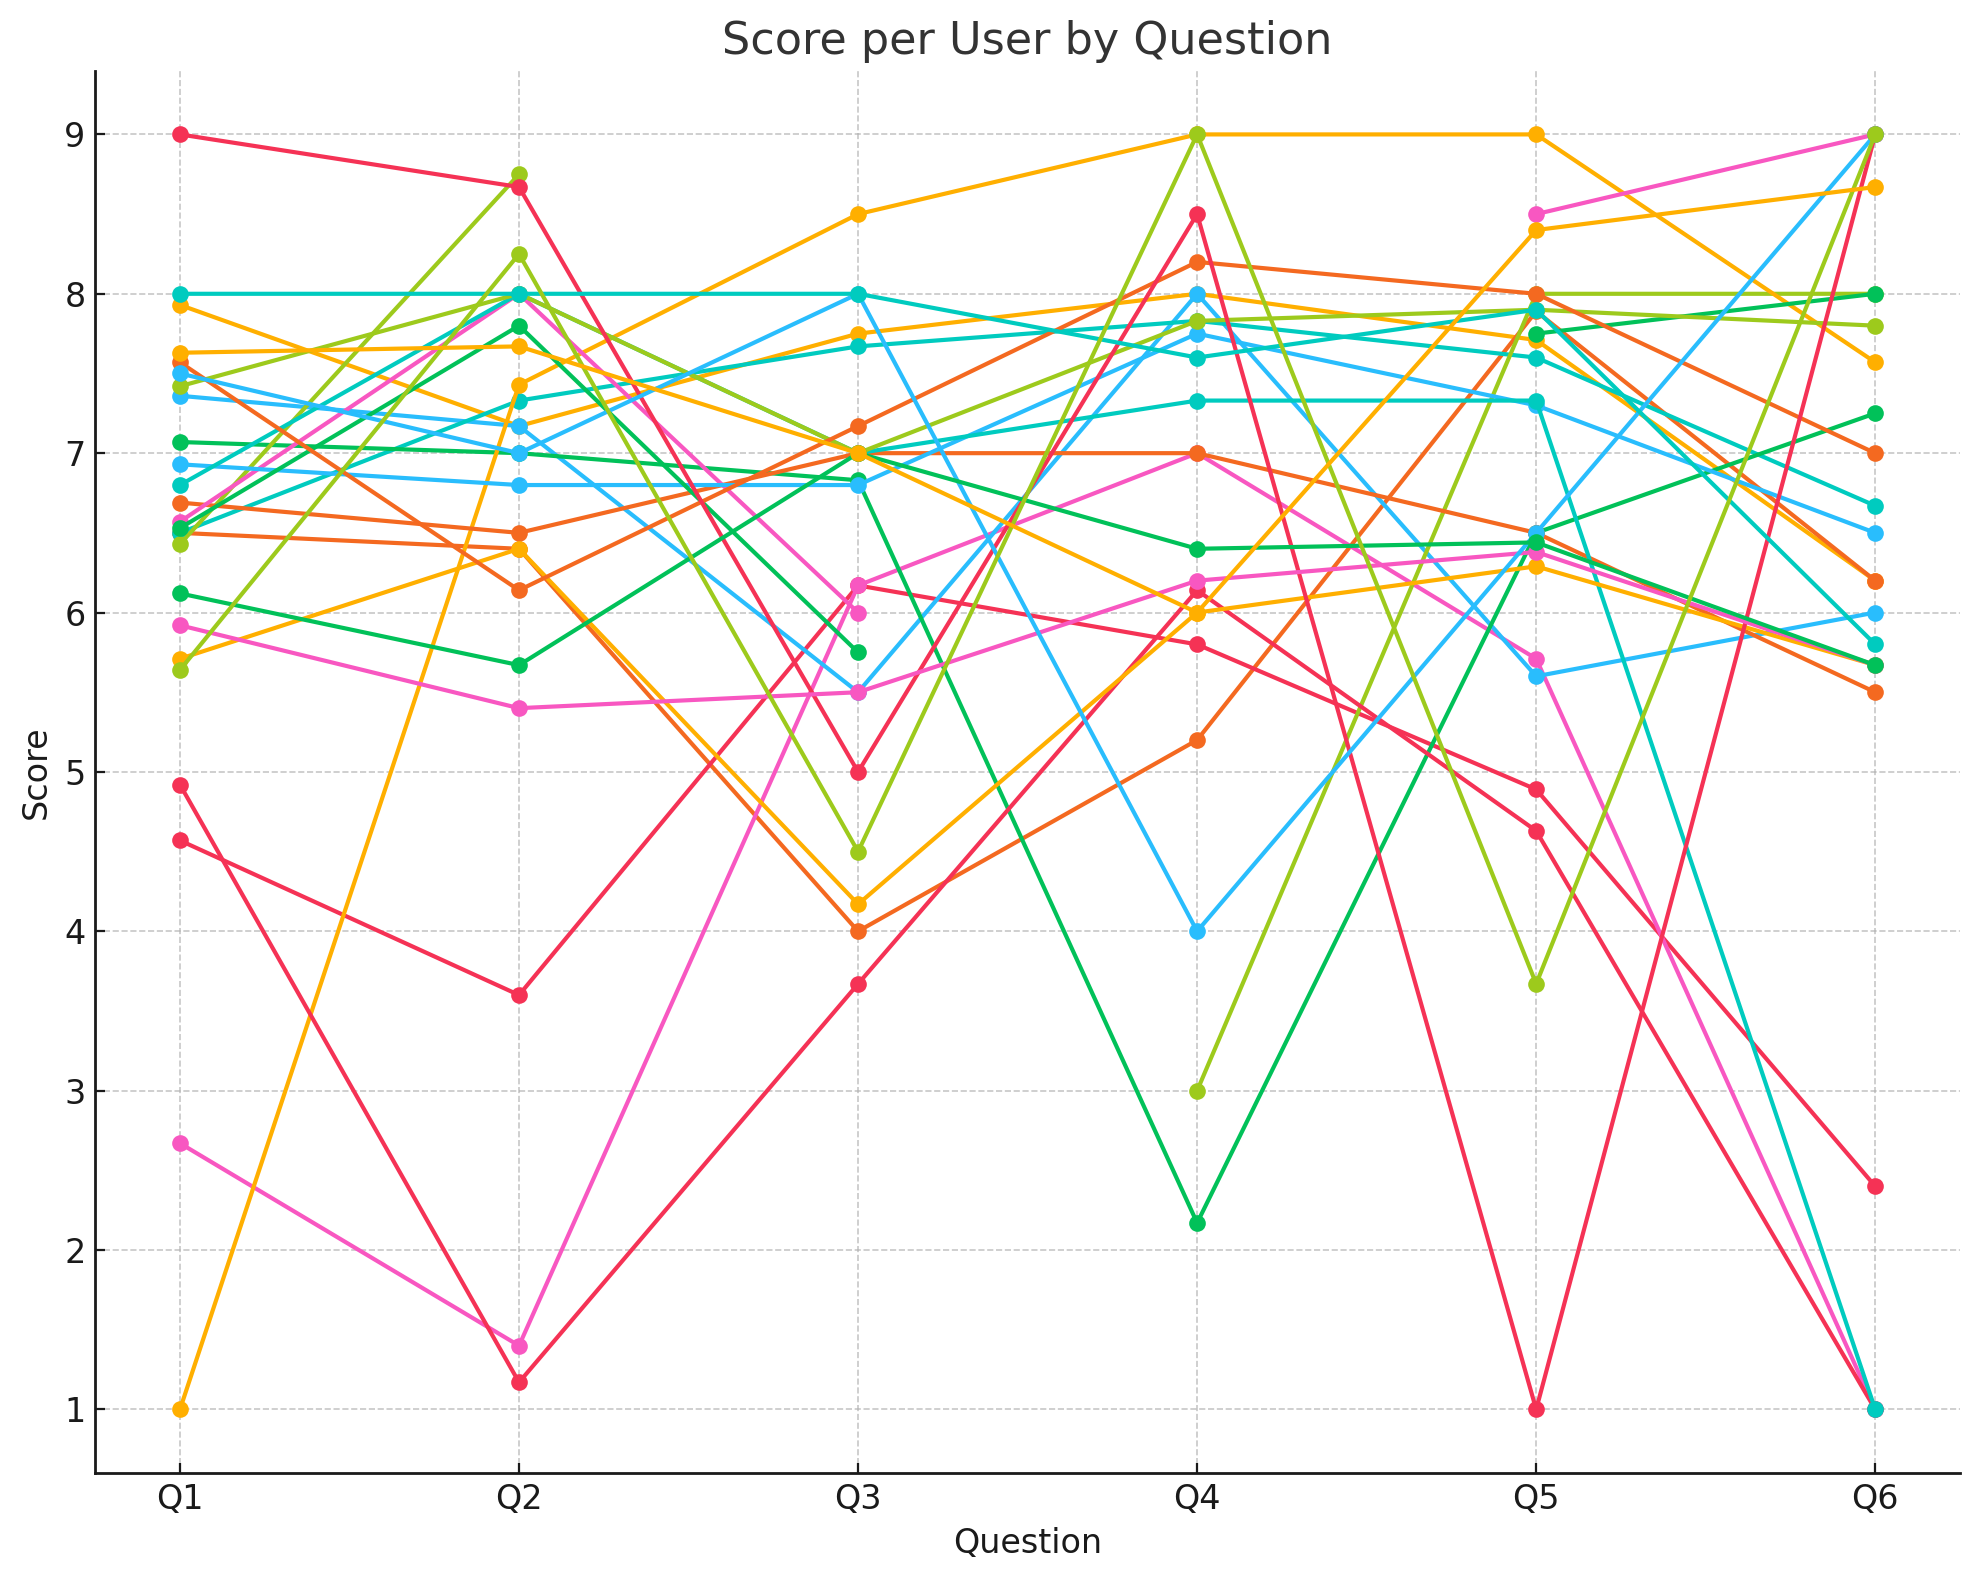


Appendix 2 Example conversational exchanges showing the rating-first, rationale-second interaction pattern.


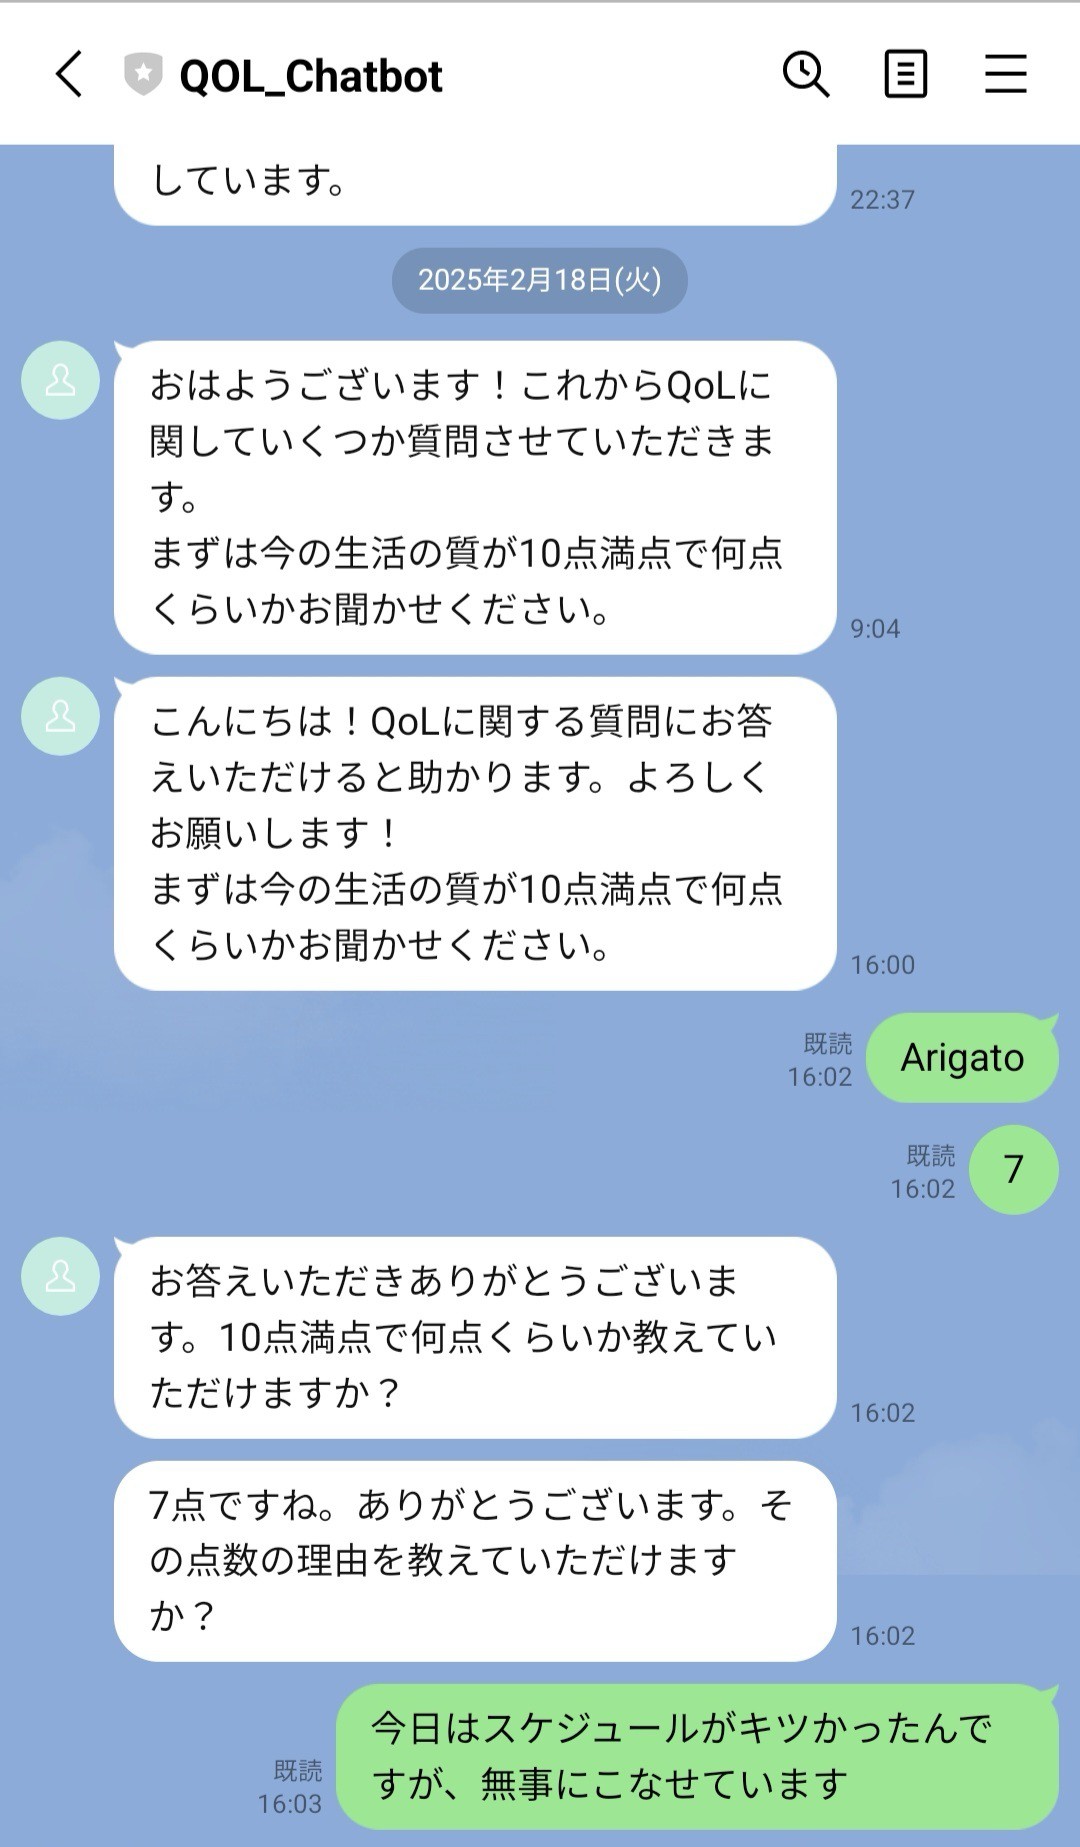

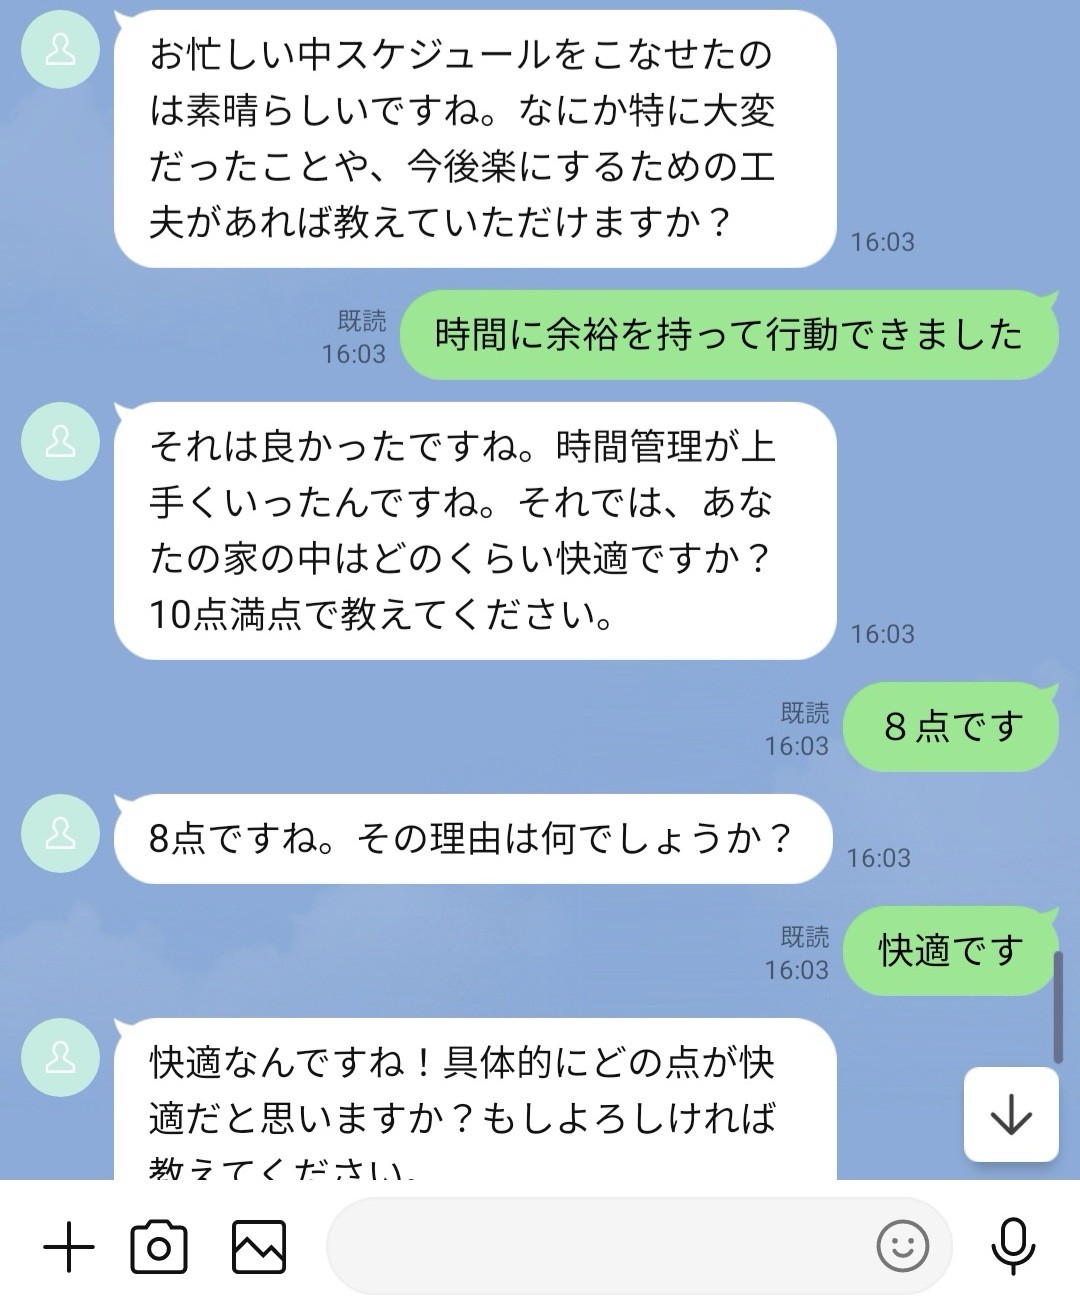

Supplement: Supplementary file 1 [file 5c19ca4dcf40fe06abe49c3b.docx]
